# Supplementary material for: Controllable synthesis of perovskite solid solutions as novel energetic materials via thermodynamic equilibrium
Source: Royal Society of Chemistry journal article supplement (doi:10.1039/d5sc05641a), 2025-11-10
Supplement: d5sc05641a1.pdf [file d5sc05641a1.pdf]

## Supplementary Information

### **Controllable synthesis of perovskite solid solutions as novel energetic materials via thermodynamic equilibrium**

Min Li,<sup>[a]</sup> Dandan Han,<sup>\*[a]</sup> Zheng Lin,<sup>[b]</sup> Xiujuan Qi,<sup>[c]</sup> Honglei Xia,<sup>\*[b]</sup> Zhao Wang,<sup>[a]</sup> Qinghua Zhang,<sup>\*[b]</sup> and Junbo Gong<sup>[a]</sup>

[a] M. Li, D. Han, Z. Wang, J. Gong

State Key Laboratory of Chemical Engineering

School of Chemical Engineering and Technology

Tianjin University, Tianjin 300072, People's Republic of China

E-mail: handandan@tju.edu.cn; xia\_honglei@nwpu.edu.cn; qinghuazhang@nwpu.edu.cn

[b] Z. Lin, H. Xia, Q. Zhang

National Key Laboratory of Solid Propulsion

School of Astronautics

Northwestern Polytechnical University, Xi'an 710072, People's Republic of China

[c] X. Qi

School of Chemistry and Chemical Engineering

Northwestern Polytechnical University, Xi'an 710129, People's Republic of China

## Table of contents

**Table S1.** Crystallographic data and structural refinements of  $(\text{H}_2\text{dabco})(\text{NH}_4)_{0.715}\text{Na}_{0.285}(\text{ClO}_4)_3$ .

**Table S2.** The information for  $(\text{H}_2\text{dabco})(\text{NH}_4)_{(1-x)}\text{Na}_x(\text{ClO}_4)_3$  solid solutions.

**Table S3.** The information for the DAP-4 and DAP-1 prepared in this work.

**Figure S1.** PXRD patterns of  $(\text{H}_2\text{dabco})(\text{NH}_4)_{(1-x)}\text{Ag}_x(\text{ClO}_4)_3$ , DAP-4 and DAP-5.

**Table S4.** The information for  $(\text{H}_2\text{dabco})(\text{NH}_4)_{(1-x)}\text{Ag}_x(\text{ClO}_4)_3$  solid solutions.

**Table S5.** Crystallographic data and structural refinements of  $(\text{H}_2\text{dabco})(\text{NH}_4)_{0.91}\text{Ag}_{0.09}(\text{ClO}_4)_3$ .

**Figure S2.** DSC curves of DAP-4, DAP-1, and  $(\text{H}_2\text{dabco})(\text{NH}_4)_{(1-x)}\text{Na}_x(\text{ClO}_4)_3$  solid solutions.

### Thermal Analysis

**Figure S3.** DSC curves of the four samples with varied heating rates.

**Table S6.** Thermal analysis for  $(\text{H}_2\text{dabco})(\text{NH}_4)(\text{ClO}_4)_3$  (DAP-4),  $(\text{H}_2\text{dabco})\text{Na}(\text{ClO}_4)_3$  (DAP-1),  $(\text{H}_2\text{dabco})(\text{NH}_4)_{0.732}\text{Na}_{0.268}(\text{ClO}_4)_3$  and  $(\text{H}_2\text{dabco})(\text{NH}_4)_{0.483}\text{Na}_{0.517}(\text{ClO}_4)_3$ .

**Figure S4.** DSC curves of  $(\text{H}_2\text{dabco})(\text{NH}_4)_{(1-x)}\text{Ag}_x(\text{ClO}_4)_3$  solid solutions.

**Table S7.** The properties of the samples involved in this work.

### Detonation performance

**Table S8.** The assumed combustion reactions of the six samples involved in Table 1.

**Table S9.** Enthalpy of formation of the product (derived from NIST).

**Table S10.** The assumed detonation reactions determined by the K-J equation.

**Table S11.** The calculated detonation parameters of the samples prepared in this work.

**Table S12.** The previously reported detonation parameters of DAP-4, DAP-1, and DAP-5.

### References

**Table S1.** Crystallographic data and structural refinements of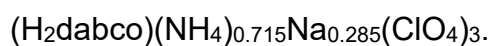

| Complex                           | $(\text{H}_2\text{dabco})(\text{NH}_4)_{0.715}\text{Na}_{0.285}(\text{ClO}_4)_3$      |
|-----------------------------------|---------------------------------------------------------------------------------------|
| Formula                           | $\text{C}_6\text{H}_{16.86}\text{O}_{12}\text{Cl}_3\text{N}_{2.715}\text{Na}_{0.285}$ |
| Formula weight                    | 431.854                                                                               |
| Temperature (K)                   | 100                                                                                   |
| Crystal system                    | cubic                                                                                 |
| Space group                       | $Pa\bar{3}$                                                                           |
| a (Å)                             | 14.3319(3)                                                                            |
| Volume (Å <sup>3</sup> )          | 2943.82(19)                                                                           |
| Density (g/cm <sup>3</sup> )      | 1.946                                                                                 |
| R <sub>int</sub>                  | 0.0243                                                                                |
| R <sub>1</sub> [ $>2\sigma(I)$ ]  | 0.0368                                                                                |
| wR <sub>2</sub> [ $>2\sigma(I)$ ] | 0.0975                                                                                |
| R <sub>1</sub> (all data)         | 0.0376                                                                                |
| wR <sub>2</sub> (all data)        | 0.0980                                                                                |
| CCDC number                       | 2465024                                                                               |

**Table S2.** The information for  $(\text{H}_2\text{dabco})(\text{NH}_4)_{(1-x)}\text{Na}_x(\text{ClO}_4)_3$  solid solutions.

| Feeding molar ratio of DAP-4 and NaCl | Concentration of NaCl (mol/L) | Weight content of Na <sup>a</sup> | x     | Effective tolerance factor $t_{\text{eff}}$ | Cell parameter <sup>b</sup> [Å] |
|---------------------------------------|-------------------------------|-----------------------------------|-------|---------------------------------------------|---------------------------------|
| 1 : 0.1                               | 0.01                          | 0.20%                             | 0.037 | 0.966                                       | 14.481                          |
| 1 : 0.3                               | 0.04                          | 0.52%                             | 0.098 | 0.970                                       | 14.439                          |
| 1 : 0.5                               | 0.07                          | 0.81%                             | 0.153 | 0.973                                       | 14.384                          |
| 1 : 1                                 | 0.14                          | 1.43%                             | 0.268 | 0.980                                       | 14.340                          |
| 1 : 5                                 | 0.70                          | 2.16%                             | 0.407 | 0.989                                       | 14.285                          |
| 1 : 10                                | 1.39                          | 2.36%                             | 0.444 | 0.992                                       | 14.285                          |
| 1 : 20                                | 2.79                          | 2.75%                             | 0.517 | 0.997                                       | 14.284                          |
| 1 : 40                                | 5.58                          | 2.89%                             | 0.544 | 0.998                                       | 14.284                          |
| 1 : 45.5 <sup>c</sup>                 | 6.34                          | 3.09%                             | 0.583 | 1.001                                       | 14.282                          |

<sup>a</sup>) The weight content of Na was measured by ICP-MS. <sup>b</sup>) The cell parameter was calculated based on the PXRD data. <sup>c</sup>) The concentration of NaCl reached saturation at room temperature.

**Table S3.** The information for the DAP-4 and DAP-1 prepared in this work.

| Sample | Formula                                                                  | Weight<br>content of Na | Tolerance<br>factor $t$ | Cell parameter <sup>a</sup><br>[Å] |
|--------|--------------------------------------------------------------------------|-------------------------|-------------------------|------------------------------------|
| DAP-4  | (H <sub>2</sub> dabco)(NH <sub>4</sub> )(ClO <sub>4</sub> ) <sub>3</sub> | 0                       | 0.964                   | 14.479                             |
| DAP-1  | (H <sub>2</sub> dabco)Na(ClO <sub>4</sub> ) <sub>3</sub>                 | 5.28%                   | 1.029                   | 14.118                             |

<sup>a</sup>) The cell parameter was calculated based on the experimental PXRD data.

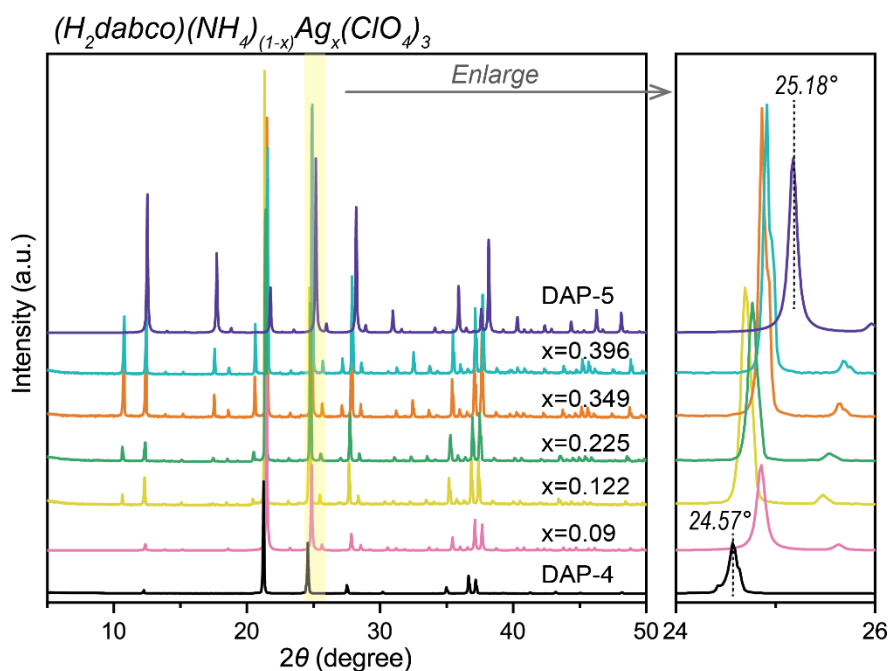**Figure S1.** PXRD patterns of (H<sub>2</sub>dabco)(NH<sub>4</sub>)<sub>(1-x)</sub>Ag<sub>x</sub>(ClO<sub>4</sub>)<sub>3</sub>, DAP-4 and DAP-5.**Table S4.** The information for (H<sub>2</sub>dabco)(NH<sub>4</sub>)<sub>(1-x)</sub>Ag<sub>x</sub>(ClO<sub>4</sub>)<sub>3</sub> solid solutions.

| Feeding molar<br>ratio of DAP-4<br>and AgClO <sub>4</sub> | Concentration of<br>AgClO <sub>4</sub> (mol/L) | Weight<br>content of<br>Ag <sup>a</sup> | x     | Effective<br>tolerance<br>factor $t_{\text{eff}}$ | Cell<br>parameter <sup>b</sup><br>[Å] |
|-----------------------------------------------------------|------------------------------------------------|-----------------------------------------|-------|---------------------------------------------------|---------------------------------------|
| 1 : 1                                                     | 0.139                                          | 3.24%                                   | 0.122 | 0.974                                             | 14.406                                |
| -                                                         | 0.249                                          | 5.85%                                   | 0.225 | 0.983                                             | 14.366                                |
| 1 : 5                                                     | 0.697                                          | 8.83%                                   | 0.349 | 0.994                                             | 14.309                                |
| 1 : 10                                                    | 1.394                                          | 9.94%                                   | 0.396 | 0.999                                             | 14.283                                |

**Table S5.** Crystallographic data and structural refinements of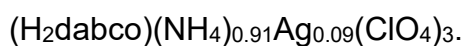

| Complex                                      | $(\text{H}_2\text{dabco})(\text{NH}_4)_{0.91}\text{Ag}_{0.09}(\text{ClO}_4)_3$      |
|----------------------------------------------|-------------------------------------------------------------------------------------|
| Formula                                      | $\text{C}_6\text{H}_{17.64}\text{O}_{12}\text{Cl}_3\text{N}_{2.91}\text{Ag}_{0.09}$ |
| Formula weight                               | 438.66                                                                              |
| Temperature (K)                              | 100                                                                                 |
| Crystal system                               | cubic                                                                               |
| Space group                                  | $Pa\bar{3}$                                                                         |
| a (Å)                                        | 14.3168(3)                                                                          |
| Volume (Å <sup>3</sup> )                     | 2934.53(18)                                                                         |
| Density (g/cm <sup>3</sup> )                 | 1.986                                                                               |
| R <sub>int</sub>                             | 0.0239                                                                              |
| R <sub>1</sub> [ <i>I</i> > 2σ( <i>I</i> )]  | 0.0323                                                                              |
| wR <sub>2</sub> [ <i>I</i> > 2σ( <i>I</i> )] | 0.0826                                                                              |
| R <sub>1</sub> (all data)                    | 0.0470                                                                              |
| wR <sub>2</sub> (all data)                   | 0.0905                                                                              |
| CCDC number                                  | 2465025                                                                             |

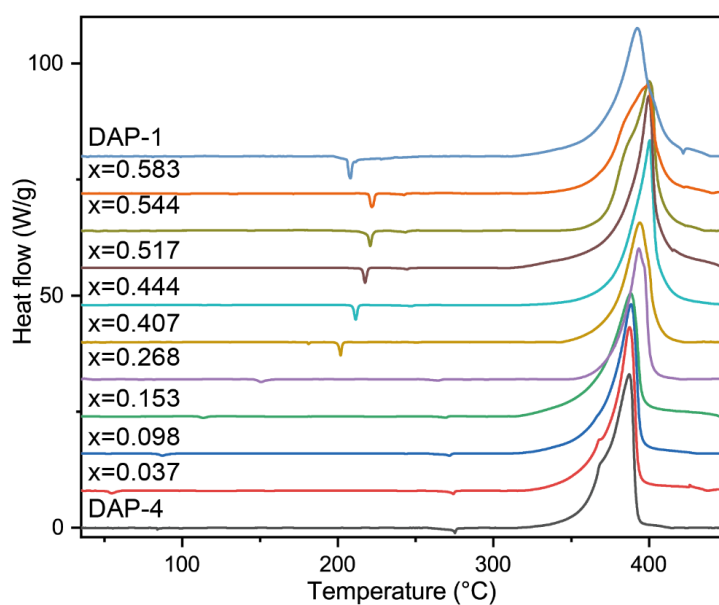**Figure S2.** DSC curves of DAP-4, DAP-1, and  $(\text{H}_2\text{dabco})(\text{NH}_4)_{(1-x)}\text{Na}_x(\text{ClO}_4)_3$  solid solutions.

## Thermal Analysis

Based on the experimental DSC data under different heating rates of 5, 10, 15, and 20 K/min, the kinetics of thermal decomposition was calculated using Kissinger's method as follows (H. E. Kissinger, *Anal. Chem.* 1957, 29, 1702-1706).

$$\ln \frac{\beta}{T_p^2} = \ln \frac{AR}{E} - \frac{E}{RT_p} \quad (S1)$$

where  $T_p$  is the peak temperature of thermal decomposition,  $\beta$  refers to the heating rate,  $E_k$  means the apparent activation energy,  $A_k$  is the pre-exponential factor, and  $R$  is the molar gas constant. The kinetic parameters were obtained by fitting the curve of  $1/T_p$  and  $\ln[\beta/T_p^2]$ .

The values ( $T_{p0}$ ) of the peak temperature ( $T_p$ ) corresponding to  $\beta \rightarrow 0$  were obtained by Eq. (S2).

$$T_p = T_{p0} + a\beta_i + b\beta_i^2 + c\beta_i^3, i = 1 \sim 4 \quad (S2)$$

The entropy of activation ( $\Delta S^\ddagger$ ), enthalpy of activation ( $\Delta H^\ddagger$ ) and free energy of activation ( $\Delta G^\ddagger$ ) corresponding to  $T = T_{p0}$ , were obtained by Eq. (S3-5), respectively.<sup>1-2</sup>

$$A = \frac{k_B T}{h} e^{\frac{\Delta S^\ddagger}{R}} \quad (S3)$$

$$A \exp\left(-\frac{E}{RT}\right) = \frac{kT}{h} \exp\left(\frac{\Delta S^\ddagger}{R}\right) \exp\left(-\frac{\Delta H^\ddagger}{RT}\right) \quad (S4)$$

$$\Delta G^\ddagger = \Delta H^\ddagger - T\Delta S^\ddagger \quad (S5)$$

Where  $k_B$  is the Boltzmann constant and  $h$  is the Planck constant.

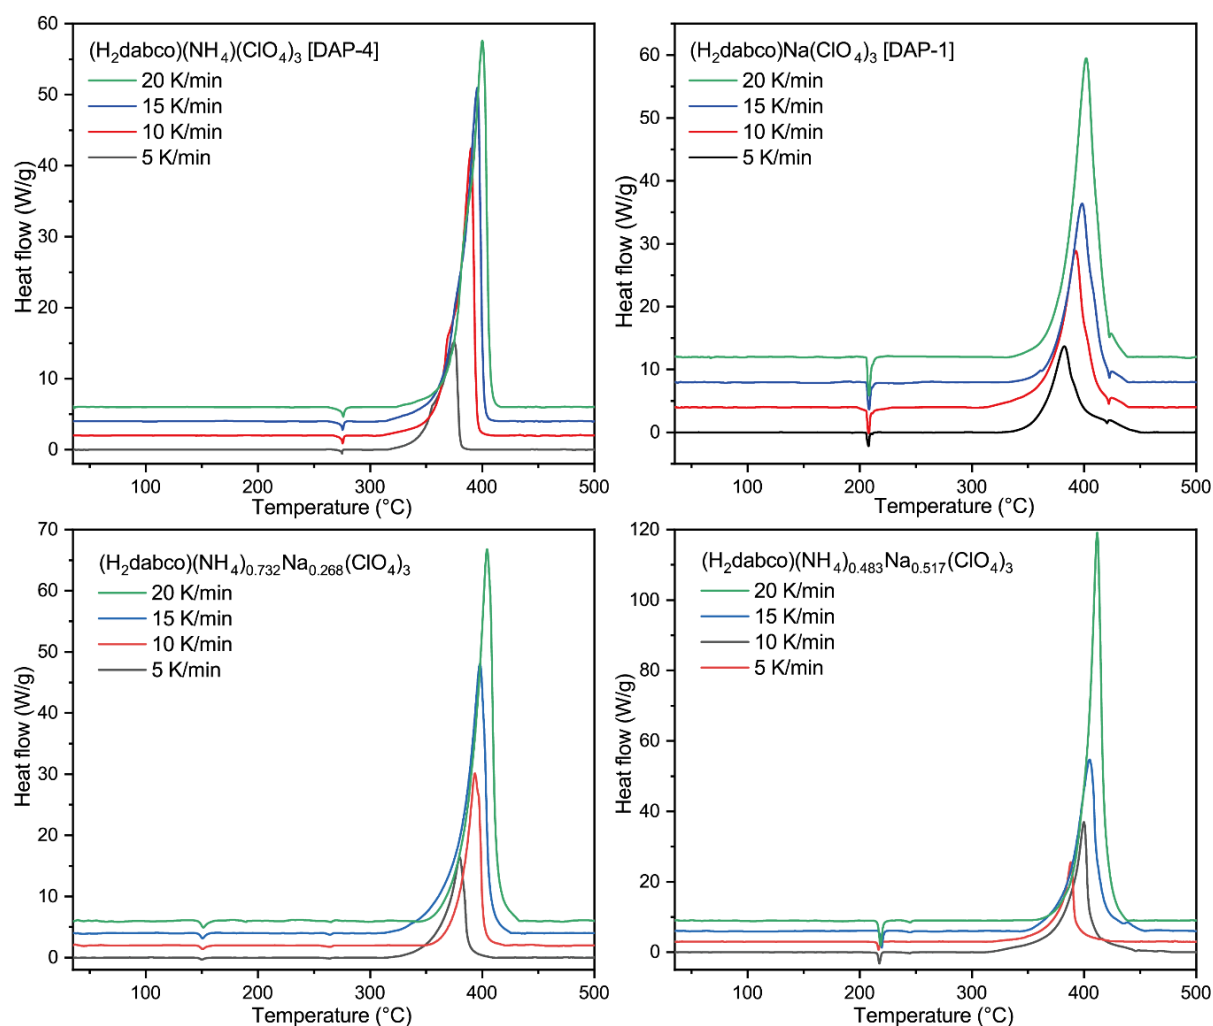

**Figure S3.** DSC curves of the four samples with varied heating rates.

**Table S6.** Thermal analysis for  $(\text{H}_2\text{dabco})(\text{NH}_4)(\text{ClO}_4)_3$  (DAP-4),  $(\text{H}_2\text{dabco})\text{Na}(\text{ClO}_4)_3$  (DAP-1),  $(\text{H}_2\text{dabco})(\text{NH}_4)_{0.732}\text{Na}_{0.268}(\text{ClO}_4)_3$  and  $(\text{H}_2\text{dabco})(\text{NH}_4)_{0.483}\text{Na}_{0.517}(\text{ClO}_4)_3$ .

| Sample               | Crystallinity <sup>c</sup> | $T_{\text{onset}}^{\text{d}}$<br>[°C] | $T_{\text{p}}^{\text{d}}$<br>[°C] | $E$<br>[kJ/mol] | LgA   | $R^2$ | $T_{\text{p0}}$<br>[°C] | $\Delta H^\ddagger$<br>[kJ/mol] | $\Delta S^\ddagger$ [J/(s·mol)] | $\Delta G^\ddagger$<br>[kJ/mol] |
|----------------------|----------------------------|---------------------------------------|-----------------------------------|-----------------|-------|-------|-------------------------|---------------------------------|---------------------------------|---------------------------------|
| DAP-4                | 93.8%                      | 360.07                                | 386.64                            | 236.99          | 18.59 | 0.987 | 360.83                  | 236.99                          | 104.72                          | 170.60                          |
| DAP-1                | 93.2%                      | 373.28                                | 391.70                            | 265.93          | 20.76 | 0.999 | 364.91                  | 265.93                          | 146.23                          | 172.63                          |
| x=0.268 <sup>a</sup> | 92.3%                      | 366.12                                | 393.14                            | 203.03          | 15.69 | 0.984 | 341.40                  | 203.03                          | 49.43                           | 172.36                          |
| x=0.517 <sup>b</sup> | 91.5%                      | 377.98                                | 399.95                            | 219.40          | 16.82 | 0.986 | 358.40                  | 219.40                          | 70.81                           | 174.68                          |

<sup>a</sup>) It represents the  $(\text{H}_2\text{dabco})(\text{NH}_4)_{0.732}\text{Na}_{0.268}(\text{ClO}_4)_3$ . <sup>b</sup>) It refers to  $(\text{H}_2\text{dabco})(\text{NH}_4)_{0.483}\text{Na}_{0.517}(\text{ClO}_4)_3$ . <sup>c</sup>) The crystallinity is calculated based on PXRD data. <sup>d</sup>)  $T_{\text{onset}}$  and  $T_{\text{p}}$  are the onset temperature and peak temperature obtained at 10 K/min.

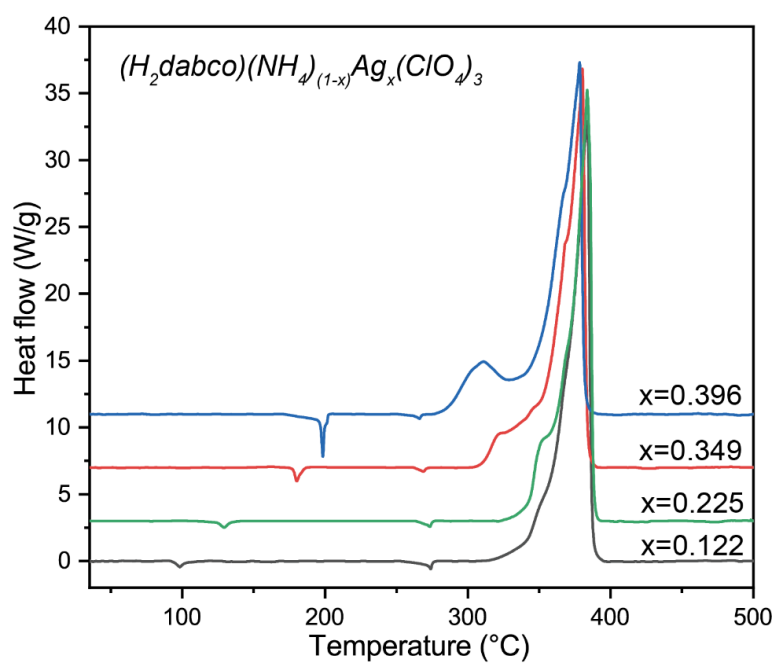

**Figure S4.** DSC curves of  $(H_2dabco)(NH_4)_{(1-x)}Ag_x(ClO_4)_3$  solid solutions.



**Table S7.** The properties of the samples involved in this work.

| Samples                                                                                                        | $T_{\text{onset}}^b$<br>[°C] | $T_p^b$ [°C] | Density <sup>c</sup><br>[g/cm <sup>3</sup> ] | Friction<br>sensitivity <sup>d</sup> [N] | Impact<br>sensitivity <sup>e</sup> [J] |
|----------------------------------------------------------------------------------------------------------------|------------------------------|--------------|----------------------------------------------|------------------------------------------|----------------------------------------|
| (H <sub>2</sub> dabco)(NH <sub>4</sub> )(ClO <sub>4</sub> ) <sub>3</sub> [DAP-4]                               | 360.07                       | 386.64       | 1.884                                        | 36                                       | >40                                    |
| (H <sub>2</sub> dabco)Na(ClO <sub>4</sub> ) <sub>3</sub> [DAP-1]                                               | 373.28                       | 391.70       | 2.055                                        | 48                                       | >40                                    |
| (H <sub>2</sub> dabco)(NH <sub>4</sub> ) <sub>0.963</sub> Na <sub>0.037</sub> (ClO <sub>4</sub> ) <sub>3</sub> | 360.68                       | 389.46       | 1.884                                        | 36                                       | >40                                    |
| (H <sub>2</sub> dabco)(NH <sub>4</sub> ) <sub>0.902</sub> Na <sub>0.098</sub> (ClO <sub>4</sub> ) <sub>3</sub> | 366.02                       | 388.58       | 1.902                                        | 42                                       | >40                                    |
| (H <sub>2</sub> dabco)(NH <sub>4</sub> ) <sub>0.847</sub> Na <sub>0.153</sub> (ClO <sub>4</sub> ) <sub>3</sub> | 370.50                       | 391.71       | 1.921                                        | 36                                       | >40                                    |
| (H <sub>2</sub> dabco)(NH <sub>4</sub> ) <sub>0.732</sub> Na <sub>0.268</sub> (ClO <sub>4</sub> ) <sub>3</sub> | 371.72                       | 393.14       | 1.945                                        | 40                                       | >40                                    |
| (H <sub>2</sub> dabco)(NH <sub>4</sub> ) <sub>0.593</sub> Na <sub>0.407</sub> (ClO <sub>4</sub> ) <sub>3</sub> | 375.71                       | 393.21       | 1.971                                        | 32                                       | >40                                    |
| (H <sub>2</sub> dabco)(NH <sub>4</sub> ) <sub>0.556</sub> Na <sub>0.444</sub> (ClO <sub>4</sub> ) <sub>3</sub> | 377.08                       | 400.85       | 1.972                                        | 48                                       | >40                                    |
| (H <sub>2</sub> dabco)(NH <sub>4</sub> ) <sub>0.483</sub> Na <sub>0.517</sub> (ClO <sub>4</sub> ) <sub>3</sub> | 377.98                       | 399.95       | 1.974                                        | 48                                       | >40                                    |
| (H <sub>2</sub> dabco)(NH <sub>4</sub> ) <sub>0.456</sub> Na <sub>0.544</sub> ClO <sub>4</sub> ) <sub>3</sub>  | 370.56                       | 399.46       | 1.974                                        | 36                                       | >40                                    |
| (H <sub>2</sub> dabco)(NH <sub>4</sub> ) <sub>0.417</sub> Na <sub>0.583</sub> (ClO <sub>4</sub> ) <sub>3</sub> | 368.77                       | 398.76       | 1.976                                        | 48                                       | >40                                    |
| (H <sub>2</sub> dabco)(NH <sub>4</sub> ) <sub>0.878</sub> Ag <sub>0.122</sub> (ClO <sub>4</sub> ) <sub>3</sub> | 347.20                       | 383.82       | 1.961                                        | 14                                       | >40                                    |
| (H <sub>2</sub> dabco)(NH <sub>4</sub> ) <sub>0.775</sub> Ag <sub>0.225</sub> (ClO <sub>4</sub> ) <sub>3</sub> | 342.60                       | 383.65       | 2.019                                        | 20                                       | >40                                    |
| (H <sub>2</sub> dabco)(NH <sub>4</sub> ) <sub>0.651</sub> Ag <sub>0.349</sub> (ClO <sub>4</sub> ) <sub>3</sub> | 309.45                       | 380.27       | 2.094                                        | 12                                       | >40                                    |
| (H <sub>2</sub> dabco)(NH <sub>4</sub> ) <sub>0.604</sub> Ag <sub>0.396</sub> (ClO <sub>4</sub> ) <sub>3</sub> | 285.99                       | 378.39       | 2.125                                        | 14                                       | >40                                    |
| (H <sub>2</sub> dabco)Ag(ClO <sub>4</sub> ) <sub>3</sub> [DAP-5] <sup>a</sup>                                  | 313.2                        | 313.6        | 2.42                                         | ≤5                                       | 3                                      |

<sup>a</sup>) The data of DAP-5 were from the reference (Y. Shang, S.-L. Chen, Z.-H. Yu, R.-K. Huang, C.-T. He, Z.-M. Ye, W.-X. Zhang, X.-M. Chen, *Inorg. Chem.* 2022, **61**, 4143-4149), while other data were from this work.

<sup>b</sup>)  $T_{\text{onset}}$  and  $T_p$  are the onset temperature and peak temperature obtained at 10 K/min. <sup>c</sup>) The measurements of friction sensitivity were carried out using a BAM friction tester. <sup>d</sup>) The impact sensitivity was measured on a standard BAM Fallhammer, during which the sample is placed in the plunger assembly, consisting of two steel rollers, a hollow steel collar, and a centering ring for fixation (note that to avoid the influence of friction, the sample should not touch the wall of the hollow steel collar).

## Detonation performance

The standard enthalpy of formation ( $\Delta_f H_m^\theta$ ) of explosive samples was calculated based on the constant-volume combustion energy ( $\Delta_c U$ ). The  $\Delta_c U$  of the six samples involved in Table 1 (besides DAP-5, since it is highly sensitive to mechanical stimulus) was measured on an oxygen calorimeter (ZDHW-HN7000, HUANENG, China), using the average value of three measurements of each sample. The sample mass of each test was around 0.2 g.

$$\Delta_c H_m^\theta = \Delta_c U + \Delta n RT \quad (S6)$$

where  $\Delta_c H_m^\theta$  represents the standard molar enthalpy of combustion,  $\Delta n = n$  (gaseous products) –  $n$  (gaseous reactants),  $R$  is  $8.314 \text{ J} \cdot \text{mol}^{-1} \text{K}^{-1}$ , and  $T$  is  $298.15 \text{ K}$ .

$$\Delta_f H_m^\theta(\text{explosives}) = \sum n \Delta_f H_m^\theta(\text{product}) - n \Delta_f H_m^\theta(\text{O}_2, \text{reactant}) - \Delta_c H_m^\theta \quad (S7)$$

The modified K-J equation was applied to estimate detonation performance (detonation heat, detonation pressure, and detonation velocity). The equations are as follows.<sup>3-4</sup>

$$D = 1.01 \left( N M^{\frac{1}{2}} Q^{\frac{1}{2}} \right)^{\frac{1}{2}} (1 + 1.30 \rho_0) \quad (S8)$$

$$P = 1.55 \rho_0^2 M^{\frac{1}{2}} Q^{\frac{1}{2}} \quad (S9)$$

$$Q = \frac{-[\Delta_f H(\text{detonation products}) - \Delta_f H(\text{explosive})]}{\text{formula weight of explosives}} \quad (S10)$$

where  $D$  is detonation velocity (km/s),  $P$  is detonation pressure (GPa),  $Q$  is detonation heat (cal/g),  $\rho_0$  represents the density of explosive ( $\text{g cm}^{-3}$ ),  $N$  is the moles of detonation gases per gram of explosive (mol/g), and  $M$  is the average molecular weight of the gases (g/mol).

The possible detonation reactions are assumed as in Table S8. Given the enthalpies of formation of the products in Table S9, the calculated detonation parameters are listed in Table S10.

**Table S8.** The assumed combustion reactions of the six samples involved in Table 1.

| Reactants                                                                                                                                |                    | Products            |                      |         |                    |          |          |
|------------------------------------------------------------------------------------------------------------------------------------------|--------------------|---------------------|----------------------|---------|--------------------|----------|----------|
| Compounds                                                                                                                                | O <sub>2</sub> (g) | CO <sub>2</sub> (g) | H <sub>2</sub> O (l) | HCl (g) | N <sub>2</sub> (g) | NaCl (s) | AgCl (s) |
| (C <sub>6</sub> H <sub>14</sub> N <sub>2</sub> )(NH <sub>4</sub> )(ClO <sub>4</sub> ) <sub>3</sub> [DAP-4] <sup>a</sup>                  | 3.75 <sup>b</sup>  | 6                   | 7.5                  | 3       | 1.5                | 0        | 0        |
| (C <sub>6</sub> H <sub>14</sub> N <sub>2</sub> )Na(ClO <sub>4</sub> ) <sub>3</sub> [DAP-1]                                               | 3                  | 6                   | 6                    | 2       | 1                  | 1        | 0        |
| (C <sub>6</sub> H <sub>14</sub> N <sub>2</sub> )(NH <sub>4</sub> ) <sub>0.732</sub> Na <sub>0.268</sub> (ClO <sub>4</sub> ) <sub>3</sub> | 3.549              | 6                   | 7.098                | 2.732   | 1.366              | 0.268    | 0        |
| (C <sub>6</sub> H <sub>14</sub> N <sub>2</sub> )(NH <sub>4</sub> ) <sub>0.483</sub> Na <sub>0.517</sub> (ClO <sub>4</sub> ) <sub>3</sub> | 3.362              | 6                   | 6.725                | 2.483   | 1.242              | 0.517    | 0        |
| (C <sub>6</sub> H <sub>14</sub> N <sub>2</sub> )(NH <sub>4</sub> ) <sub>0.878</sub> Ag <sub>0.122</sub> (ClO <sub>4</sub> ) <sub>3</sub> | 3.659              | 6                   | 7.317                | 2.878   | 1.439              | 0        | 0.122    |
| (C <sub>6</sub> H <sub>14</sub> N <sub>2</sub> )(NH <sub>4</sub> ) <sub>0.651</sub> Ag <sub>0.349</sub> (ClO <sub>4</sub> ) <sub>3</sub> | 3.489              | 6                   | 6.977                | 2.651   | 1.326              | 0        | 0.349    |

<sup>a</sup> (C<sub>6</sub>H<sub>14</sub>N<sub>2</sub>)<sup>2+</sup> is (H<sub>2</sub>dabco)<sup>2+</sup>. <sup>b</sup> The dimensionless parameters are the stoichiometry ratios of reactions of one equivalent of explosive compound.

**Table S9.** Enthalpy of formation of the product (derived from NIST).

| Compounds                      | CO <sub>2</sub> (g) | H <sub>2</sub> O (l) | H <sub>2</sub> O (g) | HCl (g) | N <sub>2</sub> (g) | NaCl (s) | AgCl (s) |
|--------------------------------|---------------------|----------------------|----------------------|---------|--------------------|----------|----------|
| $\Delta_f H_m^\theta$ (kJ/mol) | -393.51             | -285.83              | -241.83              | -92.31  | 0                  | -411.12  | -127.01  |

**Table S10.** The assumed detonation reactions determined by the K-J equation.

| Reactants                                                                                                                                | Products |                     |                      |         |                    |          |          |
|------------------------------------------------------------------------------------------------------------------------------------------|----------|---------------------|----------------------|---------|--------------------|----------|----------|
|                                                                                                                                          | C (s)    | CO <sub>2</sub> (g) | H <sub>2</sub> O (g) | HCl (g) | N <sub>2</sub> (g) | NaCl (s) | AgCl (s) |
| (C <sub>6</sub> H <sub>14</sub> N <sub>2</sub> )(NH <sub>4</sub> )(ClO <sub>4</sub> ) <sub>3</sub> [DAP-4]                               | 3.75     | 2.25                | 7.5                  | 3       | 1.5                | 0        | 0        |
| (C <sub>6</sub> H <sub>14</sub> N <sub>2</sub> )Na(ClO <sub>4</sub> ) <sub>3</sub> [DAP-1]                                               | 3        | 3                   | 6                    | 2       | 1                  | 1        | 0        |
| (C <sub>6</sub> H <sub>14</sub> N <sub>2</sub> )(NH <sub>4</sub> ) <sub>0.732</sub> Na <sub>0.268</sub> (ClO <sub>4</sub> ) <sub>3</sub> | 3.549    | 2.451               | 7.098                | 2.732   | 1.366              | 0.268    | 0        |
| (C <sub>6</sub> H <sub>14</sub> N <sub>2</sub> )(NH <sub>4</sub> ) <sub>0.483</sub> Na <sub>0.517</sub> (ClO <sub>4</sub> ) <sub>3</sub> | 3.362    | 2.638               | 6.725                | 2.483   | 1.242              | 0.517    | 0        |
| (C <sub>6</sub> H <sub>14</sub> N <sub>2</sub> )(NH <sub>4</sub> ) <sub>0.878</sub> Ag <sub>0.122</sub> (ClO <sub>4</sub> ) <sub>3</sub> | 3.659    | 2.341               | 7.318                | 2.878   | 1.439              | 0        | 0.122    |
| (C <sub>6</sub> H <sub>14</sub> N <sub>2</sub> )(NH <sub>4</sub> ) <sub>0.651</sub> Ag <sub>0.349</sub> (ClO <sub>4</sub> ) <sub>3</sub> | 3.489    | 2.511               | 6.978                | 2.651   | 1.326              | 0        | 0.349    |

**Table S11.** The calculated detonation parameters of the samples prepared in this work.

| Compounds <sup>a</sup>                                                                                                                   | $\rho^b$<br>(g/cm <sup>3</sup> ) | $\Delta_c U$<br>(kJ/mol) | $\Delta_f H_m^\theta$<br>(kJ/mol) | N (mol/g) | M (g/mol) | Q<br>(kJ/g) | P<br>(GPa) | D<br>(km/s) |
|------------------------------------------------------------------------------------------------------------------------------------------|----------------------------------|--------------------------|-----------------------------------|-----------|-----------|-------------|------------|-------------|
| (C <sub>6</sub> H <sub>14</sub> N <sub>2</sub> )(NH <sub>4</sub> )(ClO <sub>4</sub> ) <sub>3</sub> [DAP-4]                               | 1.88                             | -4884.60                 | 86.15                             | 0.03310   | 27.0526   | 7.11        | 39.07      | 9.2836      |
| (C <sub>6</sub> H <sub>14</sub> N <sub>2</sub> )Na(ClO <sub>4</sub> ) <sub>3</sub> [DAP-1]                                               | 2.05                             | -4567.38                 | -119.28                           | 0.02756   | 28.4167   | 7.14        | 39.77      | 9.1393      |
| (C <sub>6</sub> H <sub>14</sub> N <sub>2</sub> )(NH <sub>4</sub> ) <sub>0.732</sub> Na <sub>0.268</sub> (ClO <sub>4</sub> ) <sub>3</sub> | 1.95                             | -4909.52                 | 141.04                            | 0.03161   | 27.3741   | 7.38        | 40.74      | 9.3937      |
| (C <sub>6</sub> H <sub>14</sub> N <sub>2</sub> )(NH <sub>4</sub> ) <sub>0.483</sub> Na <sub>0.517</sub> (ClO <sub>4</sub> ) <sub>3</sub> | 1.97                             | -4589.35                 | -151.30                           | 0.03023   | 27.6992   | 6.82        | 38.82      | 9.1314      |
| (C <sub>6</sub> H <sub>14</sub> N <sub>2</sub> )(NH <sub>4</sub> ) <sub>0.878</sub> Ag <sub>0.122</sub> (ClO <sub>4</sub> ) <sub>3</sub> | 2.02                             | -4721.83                 | -28.43                            | 0.03166   | 27.1943   | 6.67        | 39.32      | 9.2067      |
| (C <sub>6</sub> H <sub>14</sub> N <sub>2</sub> )(NH <sub>4</sub> ) <sub>0.651</sub> Ag <sub>0.349</sub> (ClO <sub>4</sub> ) <sub>3</sub> | 2.14                             | -4720.41                 | 59.97                             | 0.02916   | 27.4749   | 6.55        | 41.12      | 9.2468      |

<sup>a</sup> All the samples were self-prepared. <sup>b</sup> The density was calculated based on the PXRD data.

Since the detonation parameters in Table S11 were calculated through the same method, their relative relations can be of reference significance for the initial assessment of explosive properties for energetic perovskite solid solutions.

For the case of  $(\text{C}_6\text{H}_{14}\text{N}_2)(\text{NH}_4)_{(1-x)}\text{Na}_x(\text{ClO}_4)_3$  solid solutions, the comparisons of the involved four samples concerning detonation parameters ( $Q$ ,  $P$ , and  $D$ ) are listed below.

$Q$ :  $(\text{C}_6\text{H}_{14}\text{N}_2)(\text{NH}_4)_{0.732}\text{Na}_{0.268}(\text{ClO}_4)_3 > \text{DAP-4} > \text{DAP-1} > (\text{C}_6\text{H}_{14}\text{N}_2)(\text{NH}_4)_{0.483}\text{Na}_{0.517}(\text{ClO}_4)_3$

$P$ :  $(\text{C}_6\text{H}_{14}\text{N}_2)(\text{NH}_4)_{0.732}\text{Na}_{0.268}(\text{ClO}_4)_3 > \text{DAP-4} > \text{DAP-1} > (\text{C}_6\text{H}_{14}\text{N}_2)(\text{NH}_4)_{0.483}\text{Na}_{0.517}(\text{ClO}_4)_3$

$D$ :  $(\text{C}_6\text{H}_{14}\text{N}_2)(\text{NH}_4)_{0.732}\text{Na}_{0.268}(\text{ClO}_4)_3 > \text{DAP-4} > \text{DAP-1} > (\text{C}_6\text{H}_{14}\text{N}_2)(\text{NH}_4)_{0.483}\text{Na}_{0.517}(\text{ClO}_4)_3$

For the case of  $(\text{C}_6\text{H}_{14}\text{N}_2)(\text{NH}_4)_{(1-x)}\text{Ag}_x(\text{ClO}_4)_3$  solid solutions, the comparisons of the involved samples concerning detonation parameters ( $Q$ ,  $P$ , and  $D$ ) are listed below.

$Q$ :  $\text{DAP-4} > (\text{C}_6\text{H}_{14}\text{N}_2)(\text{NH}_4)_{0.878}\text{Ag}_{0.122}(\text{ClO}_4)_3 > (\text{C}_6\text{H}_{14}\text{N}_2)(\text{NH}_4)_{0.651}\text{Ag}_{0.349}(\text{ClO}_4)_3$

$P$ :  $(\text{C}_6\text{H}_{14}\text{N}_2)(\text{NH}_4)_{0.651}\text{Ag}_{0.349}(\text{ClO}_4)_3 > (\text{C}_6\text{H}_{14}\text{N}_2)(\text{NH}_4)_{0.878}\text{Ag}_{0.122}(\text{ClO}_4)_3 > \text{DAP-4}$

$D$ :  $\text{DAP-4} > (\text{C}_6\text{H}_{14}\text{N}_2)(\text{NH}_4)_{0.878}\text{Ag}_{0.122}(\text{ClO}_4)_3 > (\text{C}_6\text{H}_{14}\text{N}_2)(\text{NH}_4)_{0.651}\text{Ag}_{0.349}(\text{ClO}_4)_3$

In addition, it should be noted that the calculated detonation parameters in Table S11 are not comparable to the previously reported values in Table S12 since different calculation methods were used. The previously reported detonation parameters were obtained through DFT calculations coupled with the K-J equation.<sup>5-6</sup>

**Table S12.** The previously reported detonation parameters of DAP-4, DAP-1, and DAP-5.

| Compounds <sup>a</sup> | $Q'$ (kJ/g) | $P'$ (GPa) | $D'$ (km/s) |
|------------------------|-------------|------------|-------------|
| DAP-4                  | 5.87        | 35.2       | 8.806       |
| DAP-1                  | 6.39        | 36.5       | 8.781       |
| DAP-5                  | 4.76        | 37.9       | 8.534       |

<sup>a</sup> All the detonation data are derived from the reported literature.<sup>5-6</sup>

## References

1. H. Ma, B. Yan, Z. Li, Y. Guan, J. Song, K. Xu, R. Hu, *J. Hazard. Mater.* 2009, **169**, 1068-1073.
2. An, S. Chen, X. Li, Y. Tan, X. Cao, P. Deng, *Can. J. Chem.* 2021, **100**, 328-337.
3. M. J. Kamlet and S. J. Jacobs, *J. Chem. Phys.*, 1968, **48**, 23-35.
4. Y. Wang, J. Zhang, H. Su, S. Li, S. Zhang and S. Pang, *J. Phys. Chem. A*, 2014, **118**, 4575-4581.
5. W.-X. Zhang, S.-L. Chen, Y. Shang, Z.-H. Yu and X.-M. Chen, *Energ. Mater. Front.*, 2020, **1**, 123-135.
6. Y. Shang, S.-L. Chen, Z.-H. Yu, R.-K. Huang, C.-T. He, Z.-M. Ye, W.-X. Zhang and X.-M. Chen, *Inorg. Chem.*, 2022, **61**, 4143-4149.
